# Supplementary material for: Atomic oxygen resistance of polyimide fibers with phosphorus-containing side chains
Source: Royal Society of Chemistry journal article supplement (doi:10.1039/c6ra26941a), 2017-01-01
Supplement: c6ra26941a1.pdf [file c6ra26941a1.pdf]

## Supplementary Information

# Atomic Oxygen Resistance of Polyimide Fibers with Phosphorus-Containing Side Chains

*Yong Zhao<sup>a,b</sup>, Zhixin Dong<sup>a\*</sup>, Guomin Li<sup>a</sup>, Xuemin Dai<sup>a</sup>, Fangfang Liu<sup>a</sup>, Xiaofei Ma<sup>c</sup>,*

*Xuepeng Qiu<sup>a\*</sup>*

<sup>a</sup> Polymer Composites Engineering Laboratory, Changchun Institute of Applied  
Chemistry, Chinese Academy of Sciences, Changchun 130022, P. R. China

<sup>b</sup> University of Chinese Academy of Sciences, Beijing 100049, P. R. China

<sup>c</sup> Academy of Space Electronic Information Technology, Xi'an 710100, P. R. China

---

\* Corresponding Author. E-mail: [zxdong@ciac.ac.cn](mailto:zxdong@ciac.ac.cn)

\* Corresponding Author. E-mail: [xp\\_q@ciac.ac.cn](mailto:xp_q@ciac.ac.cn)

**Table S1.** Mass loss of PI fibers versus AO exposure with difference fluence.

| No.    | Diamine | SEM       | Mass loss <sup>a</sup> | Mass loss             |
|--------|---------|-----------|------------------------|-----------------------|-----------------------|-----------------------|-----------------------|-----------------------|
|        | Ratio   | Images    | 8.3×10 <sup>19</sup>   | 1.4×10 <sup>20</sup>  | 2.0×10 <sup>20</sup>  | 2.6×10 <sup>20</sup>  | 3.4×10 <sup>20</sup>  | 5.0×10 <sup>20</sup>  |
|        | (m/n)   | No.       | atoms/cm <sup>2</sup>  | atoms/cm <sup>2</sup> | atoms/cm <sup>2</sup> | atoms/cm <sup>2</sup> | atoms/cm <sup>2</sup> | atoms/cm <sup>2</sup> |
|        |         |           | (mg/cm <sup>2</sup> )  | (mg/cm <sup>2</sup> ) | (mg/cm <sup>2</sup> ) | (mg/cm <sup>2</sup> ) | (mg/cm <sup>2</sup> ) | (mg/cm <sup>2</sup> ) |
| Kapton | --      |           | 0.35                   | 0.60                  | 0.85                  | 1.15                  | 1.45                  | 2.10                  |
| PI-0   | 0/10    | 0-a ~ 0-e | 0.35                   | 0.55                  | 0.80                  | 1.00                  | 1.20                  | 1.80                  |
| PI-2   | 2/8     | 2-a ~ 2-e | 0.35                   | 0.45                  | 0.60                  | 0.90                  | 1.15                  | 1.40                  |
| PI-4   | 4/6     | 4-a ~ 4-e | 0.35                   | 0.45                  | 0.60                  | 0.70                  | 0.80                  | 1.05                  |
| PI-6   | 6/4     | 6-a ~ 6-e | 0.25                   | 0.30                  | 0.35                  | 0.50                  | 0.60                  | 0.75                  |

<sup>a</sup> Using formula (1) to calculate the total AO fluence with Kapton<sup>®</sup> film.

**Table S2.** Retention of tensile strength and Yong's modulus of the fibers after AO exposed at  $5.0 \times 10^{20}$  atoms/cm<sup>2</sup>.

| Item | Retention of tensile strength (%) | Retention of Yong's modulus (%) |
|------|-----------------------------------|---------------------------------|
| PI-0 | 47.78                             | 59.15                           |
| PI-2 | 49.91                             | 65.31                           |
| PI-4 | 51.36                             | 51.06                           |
| PI-6 | 64.87                             | 66.04                           |

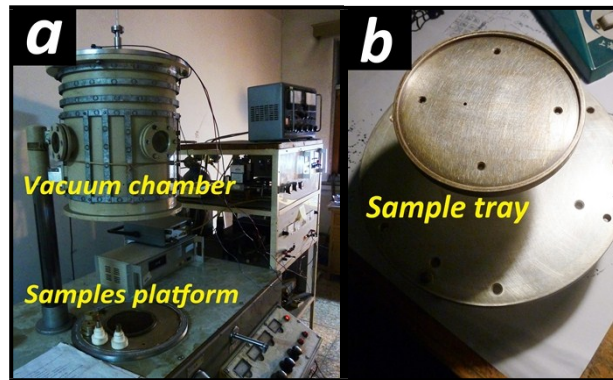

**Figure S1.** Ground-based AO effects simulation facility. (a) Vacuum chamber, (b) Sample tray.

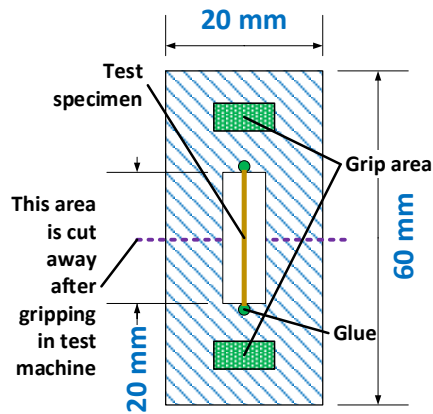

**Figure S2.** The schematic diagram of tensile testing for PI fiber.

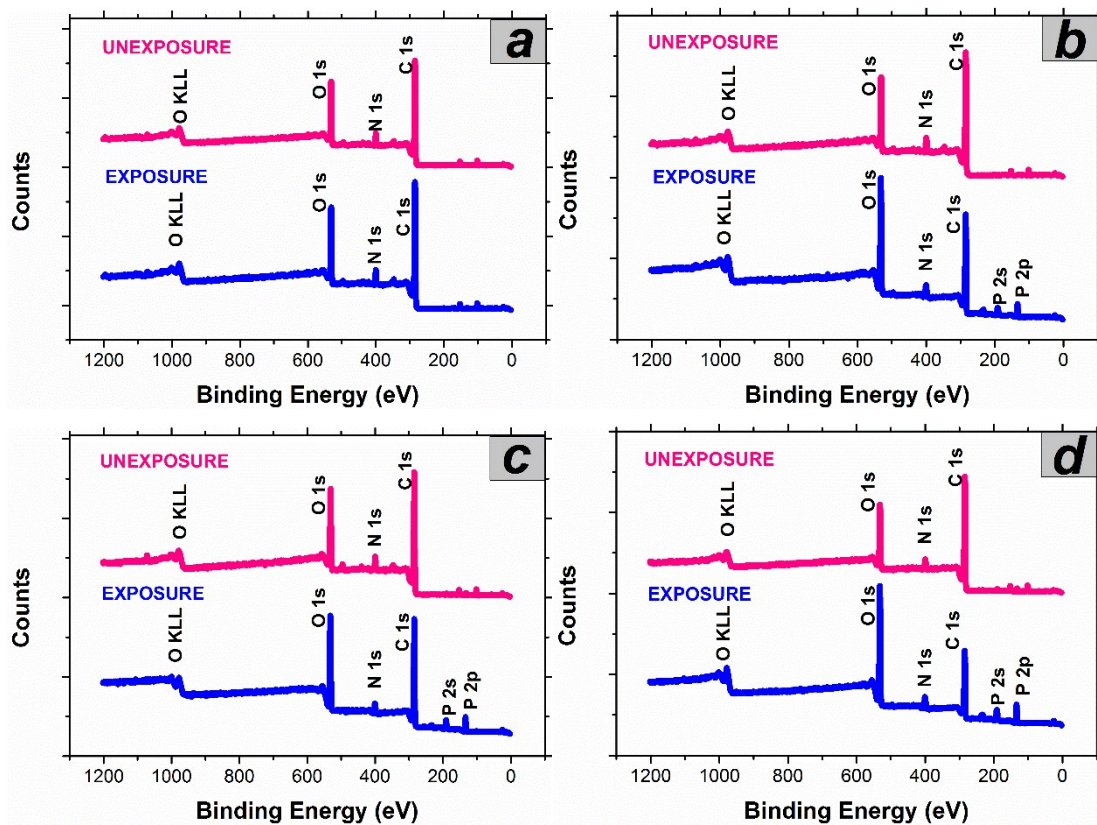

**Figure S3.** XPS survey spectra of fibers with and without AO exposure [a] PI-0, [b] PI-2, [c] PI-4, [d] PI-6.

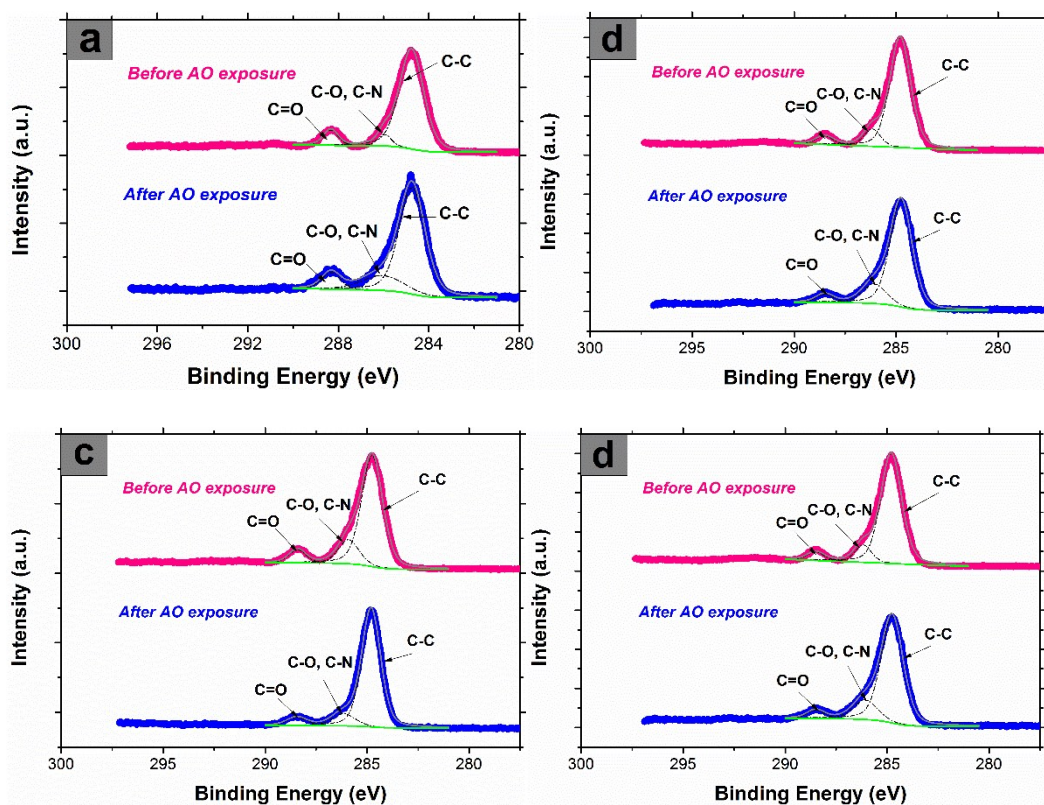

**Figure S4.** High resolution XPS C 1s spectra of PI fibers before and after exposed to AO [a] PI-0, [b] PI-2, [c] PI-4, [d] PI-6.

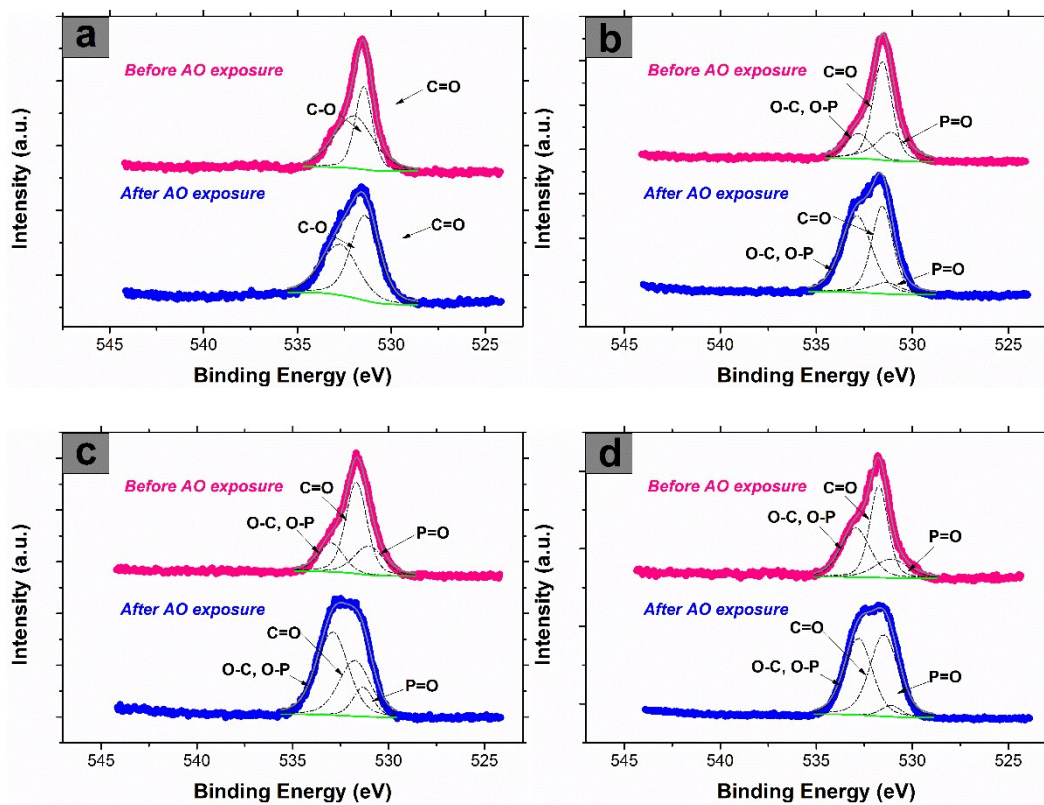

**Figure S5.** High resolution XPS O 1s spectra of PI fibers before and after exposed to AO [a] PI-0, [b] PI-2, [c] PI-4, [d] PI-6.

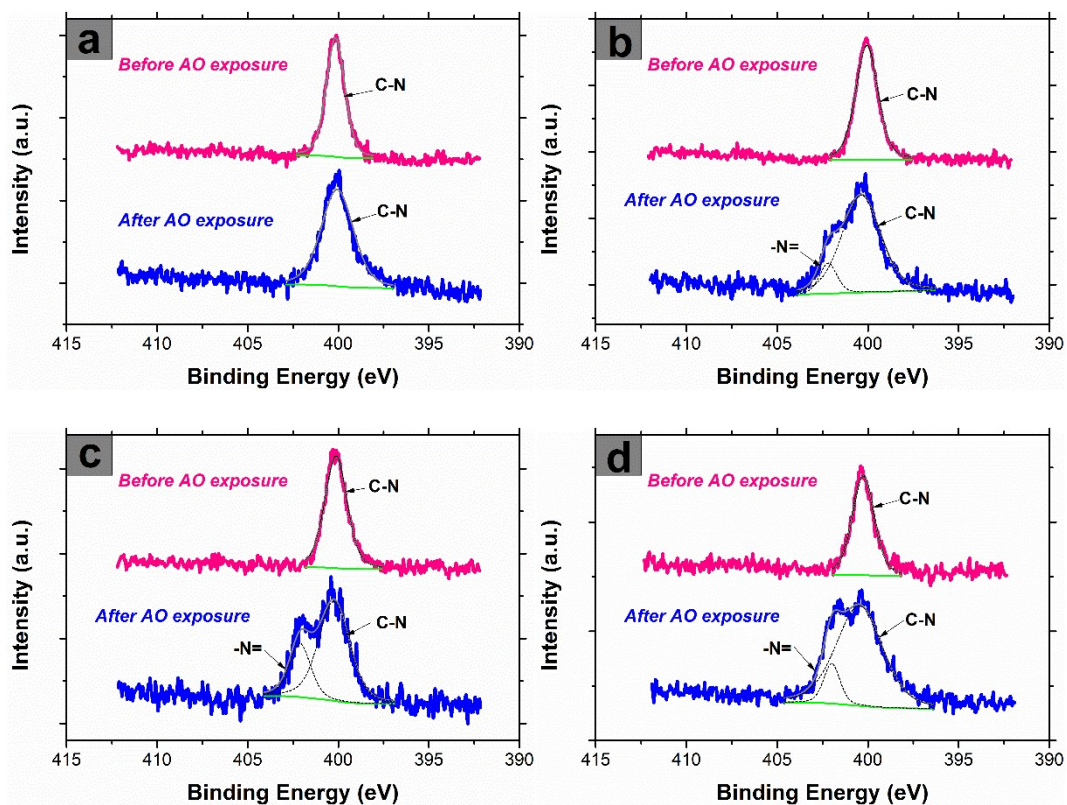

**Figure S6.** High resolution XPS N 1s spectra of PI fibers before and after exposed to AO [a] PI-0, [b] PI-2, [c] PI-4, [d] PI-6.



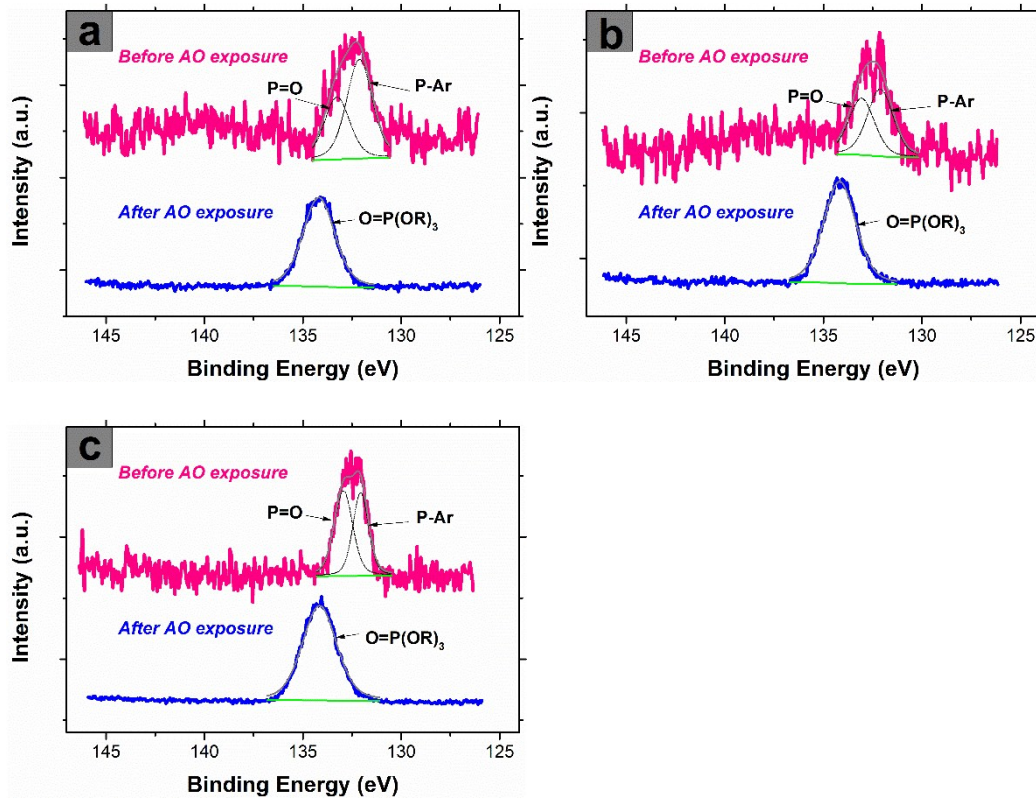

**Figure S7.** High resolution XPS P 2p spectra of PI fibers before and after exposed to AO [a] PI-2, [b] PI-4, [c] PI-6.
